# Supplementary material for: Lifespans of Twins: Does Zygosity Matter?
Source: PubMed Central journal article supplement (PMC6409769; doi:10.3390/genes10020166), 2019-02-20
Supplement: genes-10-00166-s001.pdf [file genes-10-00166-s001.pdf]

# Supplementary material

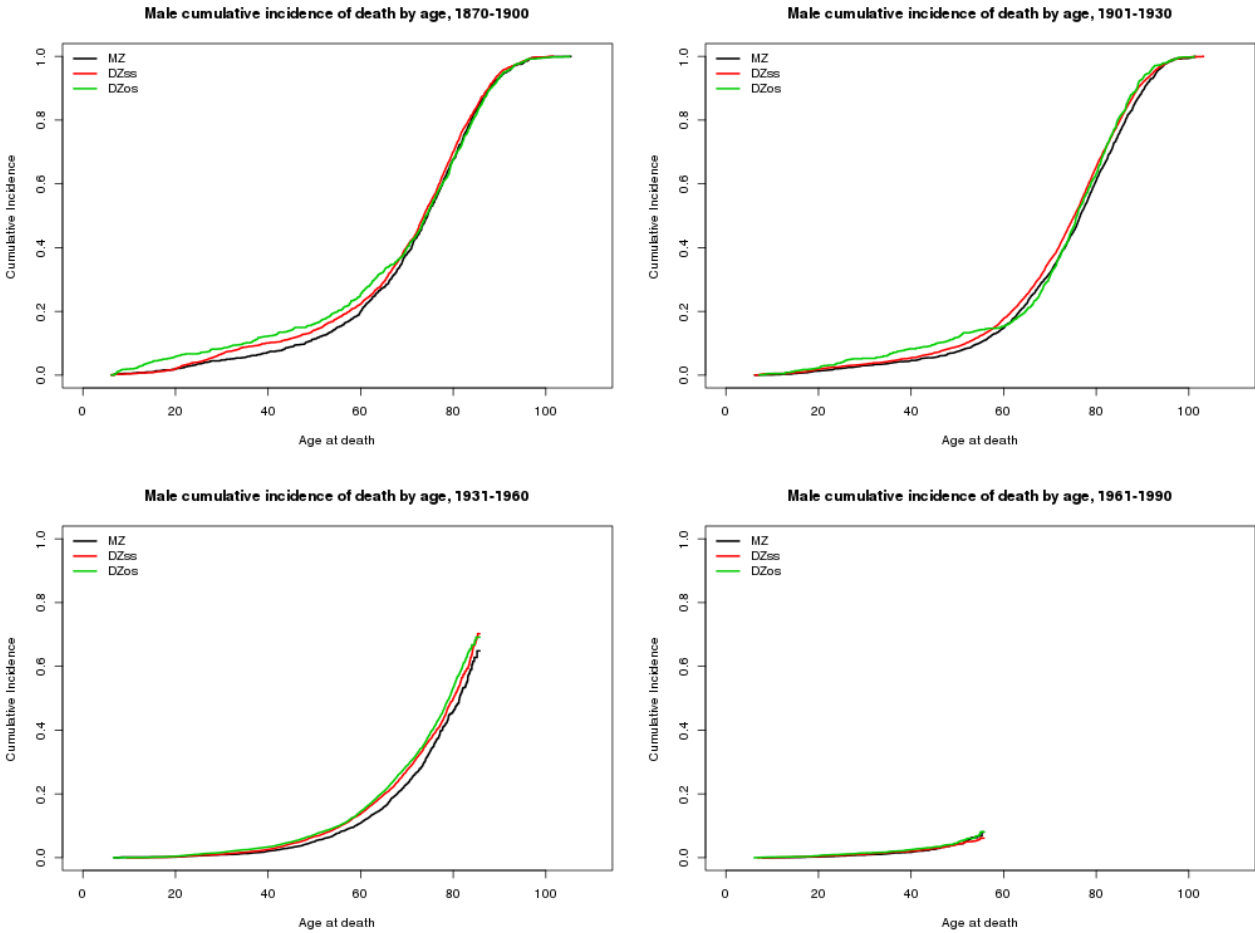

Figure S1. Cumulative incidence curves of mortality for males in each of the four cohorts

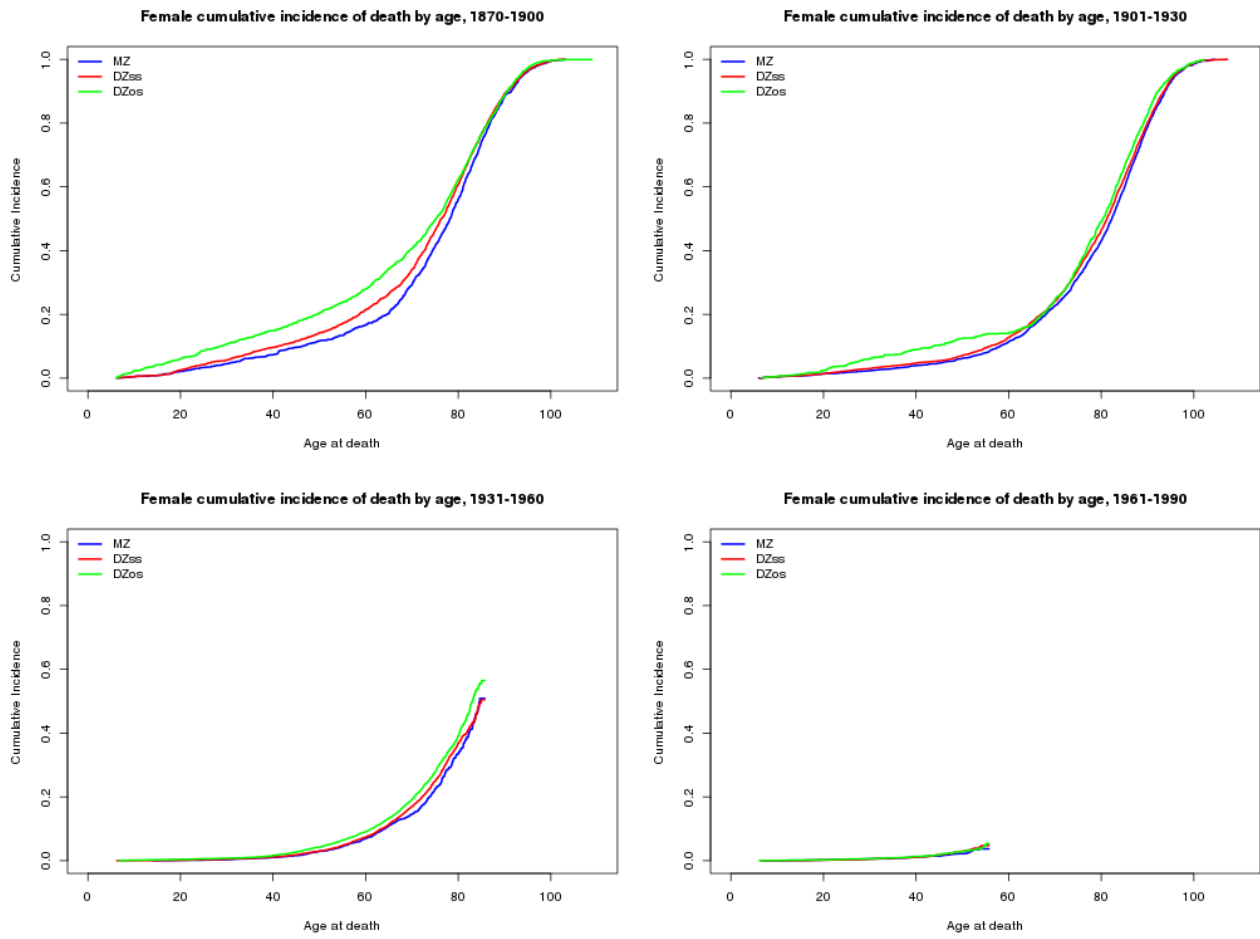

**Figure S2.** Cumulative incidence curves of mortality for females in each of the four cohorts

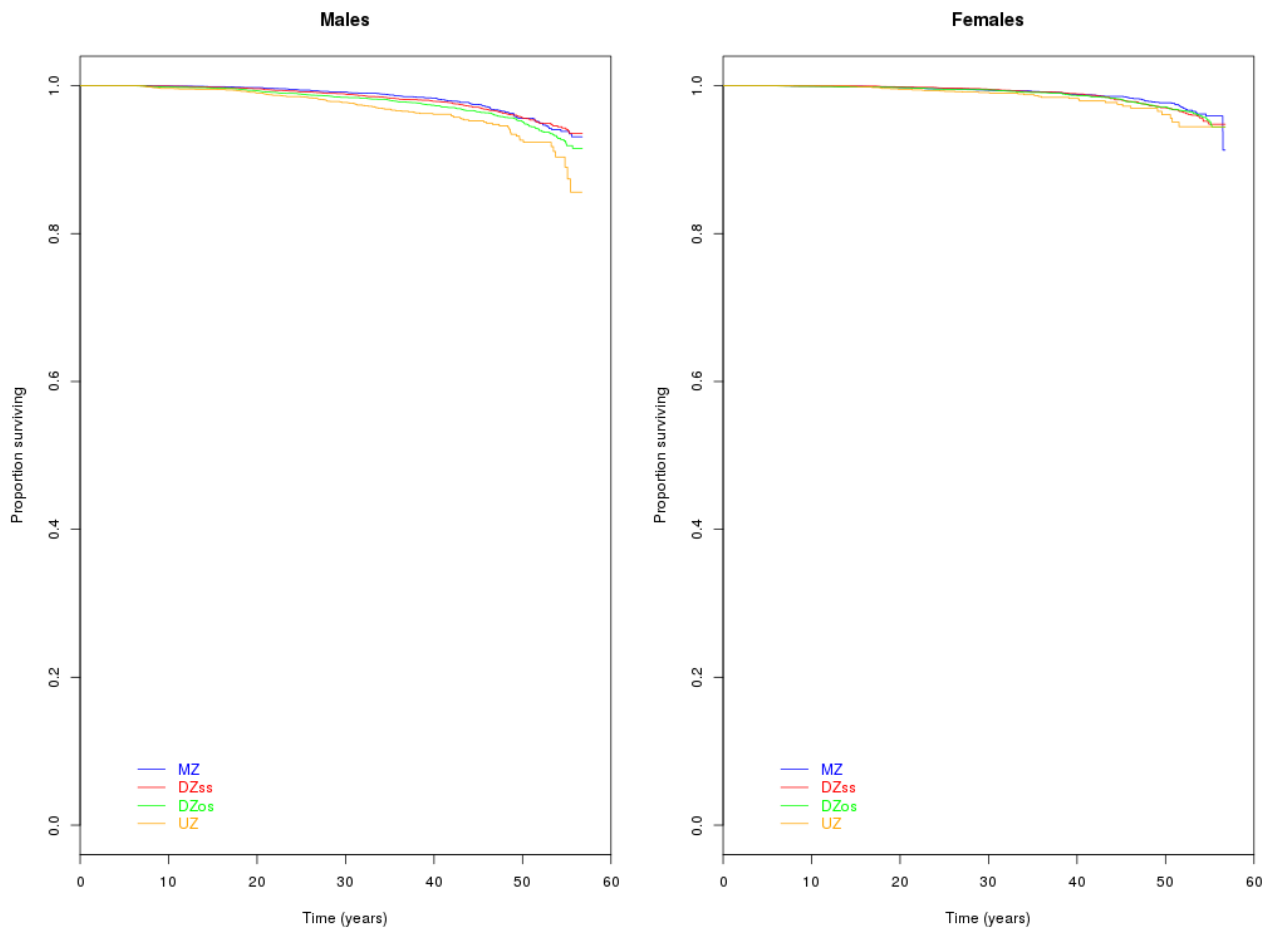

**Figure S3.** Kaplan-Meier survival curves for males and females in birth cohorts 1960–1990

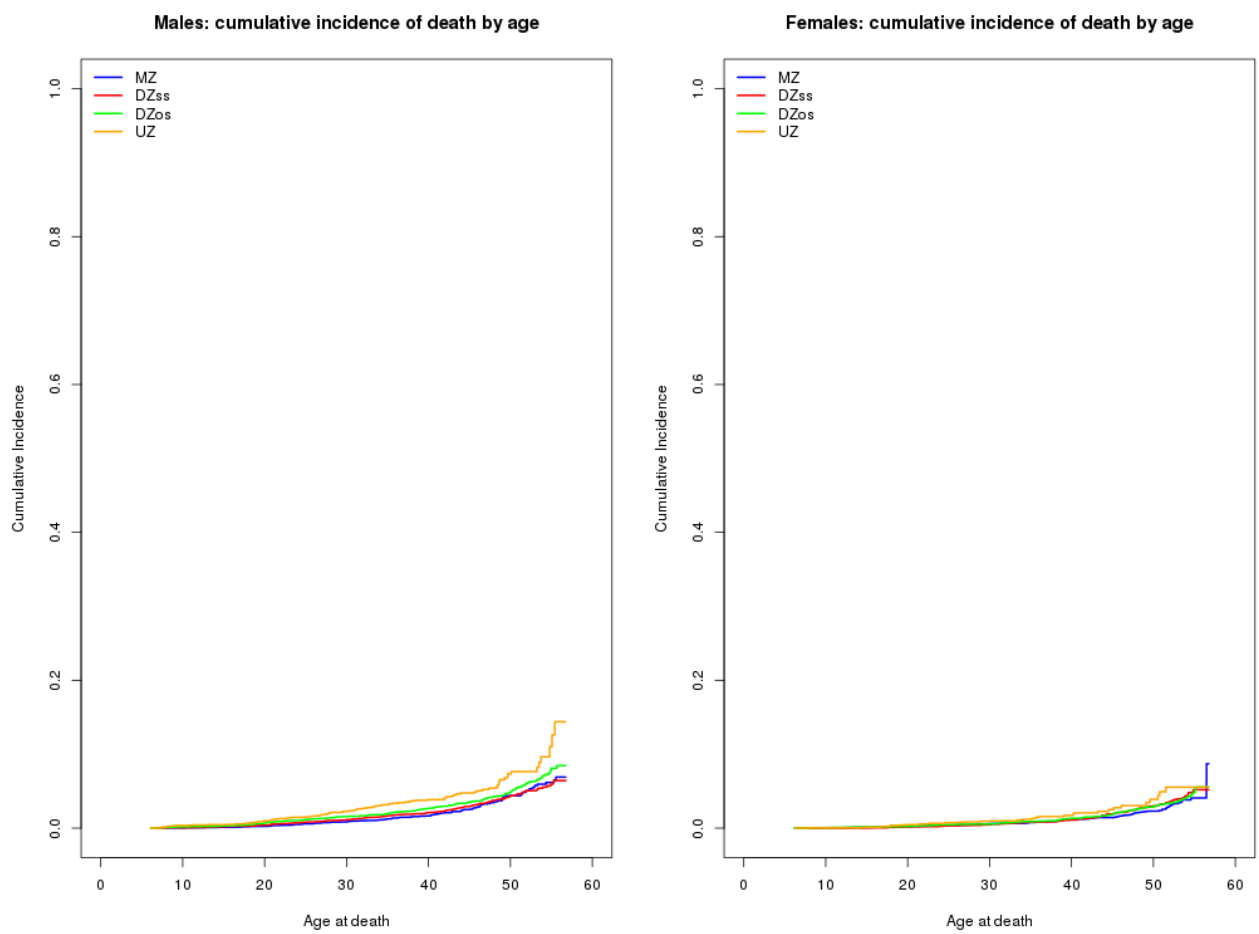

**Figure S4.** Cumulative incidence curves for males and females in birth cohorts 1960–1990

**Table S1.** Associations between mortality and zygosity in individual twins, treating all UZ-twin pairs as MZ, birth cohorts 1960–1990, surviving to age 6; among individual twins at ages up to 50 years, and from 50 years<sup>a</sup>

|                               | All ages,<br><i>n</i> = 41,053 | Ages ≤ 50,<br><i>n</i> = 41,053 | Ages > 50,<br><i>n</i> = 10,134 |
|-------------------------------|--------------------------------|---------------------------------|---------------------------------|
| <b>Both sexes<sup>b</sup></b> | HR (95%-CI)                    | HR (95%-CI)                     | HR (95%-CI)                     |
| Zygosity, <i>n</i> (%)        |                                |                                 |                                 |
| MZ                            | Ref.                           | Ref.                            | Ref.                            |
| SSDZ                          | 0.90 (0.77, 1.04)              | 0.91 (0.77, 1.07)               | 0.82 (0.52, 1.29)               |
| OSDZ                          | 1.03 (0.89, 1.20)              | 1.02 (0.87, 1.19)               | 1.14 (0.75, 1.75)               |
| <b>Males</b>                  |                                |                                 |                                 |
| Zygosity, <i>n</i> (%)        |                                |                                 |                                 |
| MZ                            | Ref.                           | Ref.                            | Ref.                            |
| SSDZ                          | 0.83 (0.68, 1.00)              | 0.84 (0.69, 1.03)               | 0.72 (0.38, 1.37)               |
| OSDZ                          | 1.03 (0.86, 1.23)              | 0.99 (0.82, 1.20)               | 1.33 (0.76, 2.33)               |
| <b>Females</b>                |                                |                                 |                                 |
| Zygosity, <i>n</i> (%)        |                                |                                 |                                 |
| MZ                            | Ref.                           | Ref.                            | Ref.                            |
| SSDZ                          | 1.03 (0.80, 1.31)              | 1.04 (0.80, 1.36)               | 0.93 (0.49, 1.77)               |
| OSDZ                          | 1.04 (0.82, 1.33)              | 1.07 (0.82, 1.39)               | 0.93 (0.49, 1.77)               |

<sup>a</sup>Composition of zygosity: 37.1% (MZ), 31.4 (SSDZ), 31.5 (OSDZ)

<sup>b</sup>Baseline hazard stratified on sex

Tests for interactions between zygosity and age-interval

All:  $p = 0.611$ , males:  $p = 0.288$ , females:  $p = 0.863$

**Table S2:** Associations between mortality and zygosity in individual twins, randomising UZ-twin pairs 1:1 to either MZ or same-sex DZ, birth cohorts 1960-1990, surviving to age 6; among individual twins at ages up to 50 years, and from 50 years<sup>a</sup>

|                               | All ages,<br><i>n</i> = 41,053 | Ages ≤50,<br><i>n</i> = 41,053 | Ages >50,<br><i>n</i> = 10,134 |
|-------------------------------|--------------------------------|--------------------------------|--------------------------------|
| <b>Both sexes<sup>b</sup></b> | HR (95%-CI)                    | HR (95%-CI)                    | HR (95%-CI)                    |
| Zygosity, <i>n</i> (%)        |                                |                                |                                |
| MZ                            | Ref.                           | Ref.                           | Ref.                           |
| SSDZ                          | 1.05 (0.90, 1.22)              | 1.09 (0.92, 1.28)              | 0.79 (0.50, 1.24)              |
| OSDZ                          | 1.12 (0.95, 1.30)              | 1.11 (0.94, 1.31)              | 1.11 (0.72, 1.71)              |
| <b>Males</b>                  |                                |                                |                                |
| Zygosity, <i>n</i> (%)        |                                |                                |                                |
| MZ                            | Ref.                           | Ref.                           | Ref.                           |
| SSDZ                          | 1.01 (0.83, 1.23)              | 1.04 (0.85, 1.27)              | 0.76 (0.39, 1.43)              |
| OSDZ                          | 1.13 (0.93, 1.37)              | 1.10 (0.89, 1.34)              | 1.35 (0.75, 2.40)              |
| <b>Females</b>                |                                |                                |                                |
| Zygosity, <i>n</i> (%)        |                                |                                |                                |
| MZ                            | Ref.                           | Ref.                           | Ref.                           |
| SSDZ                          | 1.11 (0.87, 1.43)              | 1.18 (0.90, 1.54)              | 0.82 (0.43, 1.57)              |
| OSDZ                          | 1.09 (0.85, 1.41)              | 1.14 (0.87, 1.50)              | 0.86 (0.45, 1.65)              |

<sup>a</sup>Composition of zygosity: 31.4% (MZ), 37.2 (SSDZ), 31.4 (OSDZ)

<sup>b</sup>Baseline hazard stratified on sex

Tests for interactions between zygosity and age-interval

All:  $p = 0.593$ , males:  $p = 0.303$ , females:  $p = 0.811$

**Table S3:** Associations between mortality and zygosity in individual twins, randomising UZ-twin pairs 1:2 to either MZ or same-sex DZ, birth cohorts 1960-1990, surviving to age 6; among individual twins at ages up to 50 years, and from 50 years<sup>a</sup>

|                               | All ages,<br><i>n</i> = 41 053 | Ages ≤50,<br><i>n</i> = 41 053 | Ages >50,<br><i>n</i> = 10 134 |
|-------------------------------|--------------------------------|--------------------------------|--------------------------------|
| <b>Both sexes<sup>b</sup></b> | HR (95%-CI)                    | HR (95%-CI)                    | HR (95%-CI)                    |
| Zygosity, <i>n</i> (%)        |                                |                                |                                |
| MZ                            | Ref.                           | Ref.                           | Ref.                           |
| SSDZ                          | 1.13 (0.97, 1.32)              | 1.17 (0.99, 1.38)              | 0.85 (0.54, 1.34)              |
| OSDZ                          | 1.17 (1.00, 1.37)              | 1.17 (0.98, 1.38)              | 1.15 (0.74, 1.79)              |
| <b>Males</b>                  |                                |                                |                                |
| Zygosity, <i>n</i> (%)        |                                |                                |                                |
| MZ                            | Ref.                           | Ref.                           | Ref.                           |
| SSDZ                          | 1.11 (0.91, 1.35)              | 1.14 (0.93, 1.40)              | 0.84 (0.44, 1.60)              |
| OSDZ                          | 1.19 (0.98, 1.46)              | 1.16 (0.94, 1.44)              | 1.41 (0.79, 2.54)              |
| <b>Females</b>                |                                |                                |                                |
| Zygosity, <i>n</i> (%)        |                                |                                |                                |
| MZ                            | Ref.                           | Ref.                           | Ref.                           |
| SSDZ                          | 1.15 (0.91, 1.51)              | 1.23 (0.94, 1.62)              | 0.86 (0.45, 1.65)              |
| OSDZ                          | 1.13 (0.87, 1.46)              | 1.18 (0.89, 1.56)              | 0.89 (0.46, 1.71)              |

<sup>a</sup>Composition of zygosity: 29.5% (MZ), 39.1 (SSDZ), 31.5 (OSDZ)

<sup>b</sup>Baseline hazard stratified on sex

Tests for interactions between zygosity and age-interval

All:  $p = 0.351$ , males:  $p = 0.267$ , females:  $p = 0.539$
